# Supplementary material for: Utilization of Si/SiOx/Al2O3 materials from recycled solar cells for a high-performance lithium-ion battery anode
Source: Royal Society of Chemistry journal article supplement (doi:10.1039/d2gc01770a), 2022-01-01
Supplement: d2gc01770a1.pdf [file d2gc01770a1.pdf]

ARTICLE

## Utilization of Si/SiO<sub>x</sub>/Al<sub>2</sub>O<sub>3</sub> material from recycled solar cells for high-performance lithium-ion battery anode (Electronic Supplementary Information)

Received 00th January 20xx,  
Accepted 00th January 20xx

DOI: 10.1039/x0xx00000x

www.rsc.org/

Yi-Hung Liu\*<sup>a</sup>, Yen-Lin Chen<sup>a</sup>, Yu-Sin Chen<sup>a</sup>, Shih-Ming Huang<sup>b</sup>, Hsu-Min Huang<sup>b</sup>, Shih-Jen Lin<sup>b</sup> and Ching-Yi Yang<sup>c</sup>

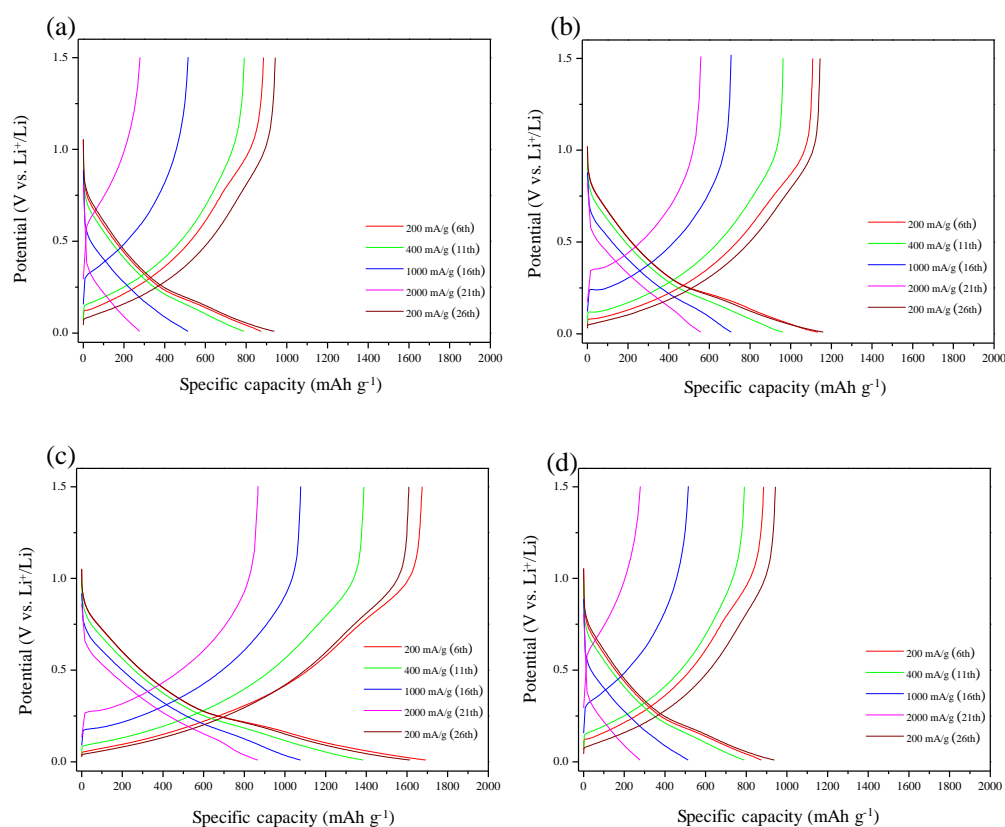

Fig. S1 Charge/discharge curves of cells comprising (a) Raw, (b) 500-1, (c) 500-2, and (d) 500-5 Si-based materials.

<sup>a</sup> Department of Chemical and Materials Engineering, National Central University, No. 300, Zhongda Rd., Zhongli Dist., Taoyuan City 32001, Taiwan (R.O.C.)

<sup>b</sup> ACON Greenergy Technology Co., Ltd. No. 28, Ln. 634, Zhongshan N. Rd., Yongkang Dist., Tainan City 71041, Taiwan (R.O.C.)

<sup>c</sup> Department of Mechanical Engineering, Chien Hsin University of Science and Technology, No.229, Jianxing Rd., Zhongli Dist., Taoyuan City 32097, Taiwan (R.O.C.)

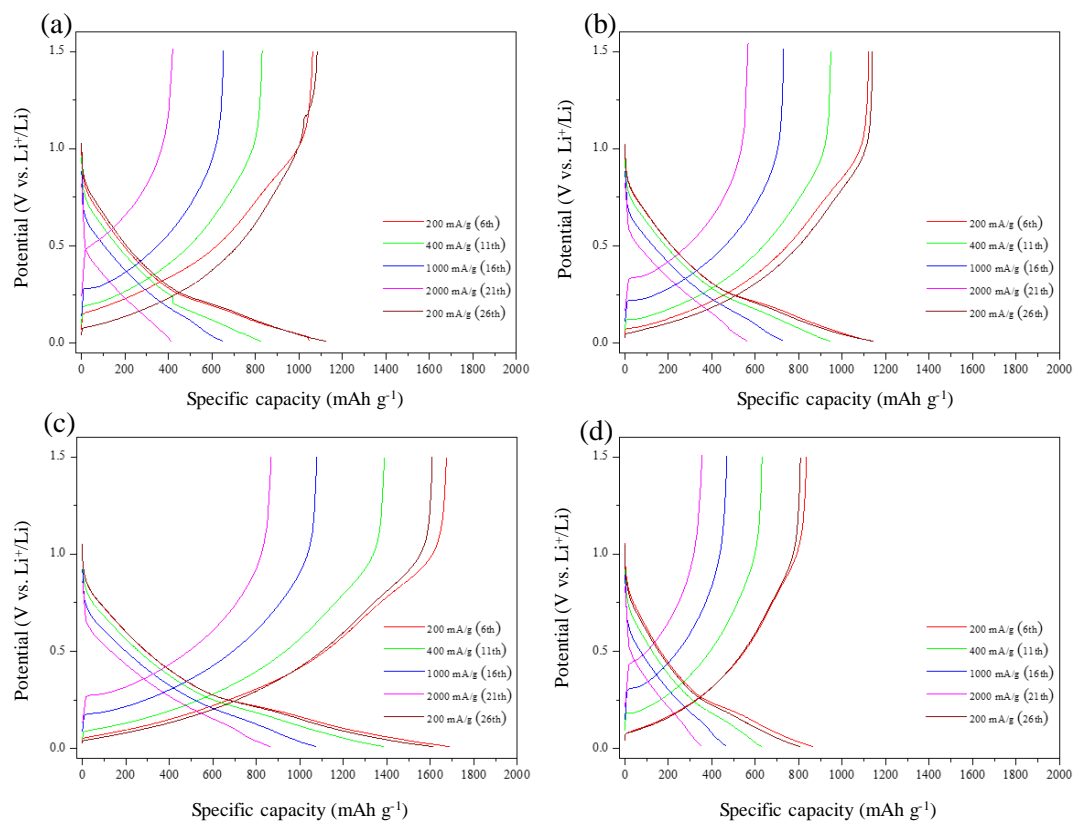

Fig. S2 Charge/discharge curves of cells comprising (a) 300-2, (b) 400-2, (c) 500-2, and (d) 600-2 Si-based materials.

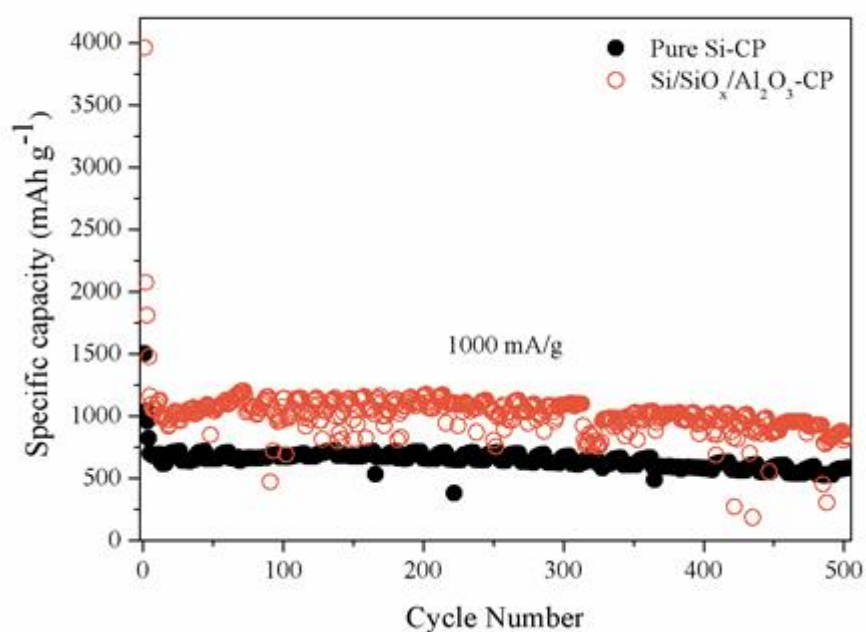

Fig. S3 Cycling performance of cells comprising commercial Si (pure Si) and typical recycled Si ( $\text{Si/SiO}_x/\text{Al}_2\text{O}_3$ , 500-2 sample).

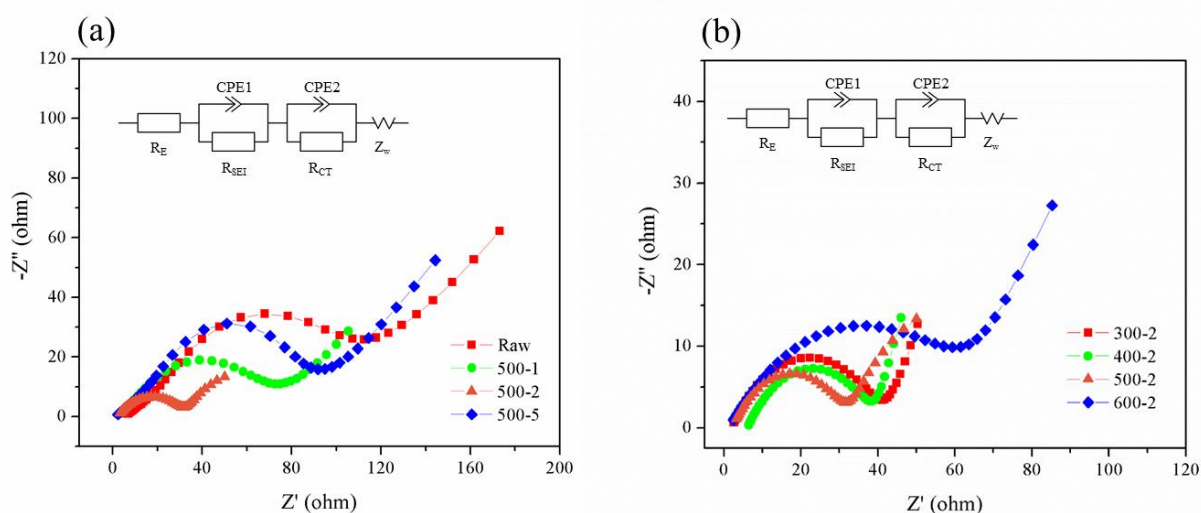

Fig. S4 EIS spectra of cells comprising recycled Si at different (a) milling times and (b) rotation speeds.

Table S1 Element composition of raw Si particles of waste solar cells

| Element           | Si    | Al    | Ag   | B    |
|-------------------|-------|-------|------|------|
| Composition (wt%) | 83.60 | 9.41  | 1.29 | 0.02 |
| Composition (at%) | 89.15 | 10.44 | 0.36 | 0.05 |

Table S2 Si oxidation states of Raw-Si and recycled Si powders at different milling times. The ratios were estimated from Si 2p peak area obtained by XPS

| Sample | Si <sup>0</sup> | Si <sup>1+</sup> | Si <sup>2+</sup> | Si <sup>3+</sup> | Si <sup>4+</sup> |
|--------|-----------------|------------------|------------------|------------------|------------------|
| Raw    | 68.15%          | 15.09%           | 6.32%            | 4.71%            | 5.73%            |
| 500-1  | 26.64%          | 13.58%           | 8.03%            | 18.92%           | 32.83%           |
| 500-2  | 25.43%          | 20.94%           | 11.89%           | 17.71%           | 24.03%           |
| 500-5  | 22.92%          | 22.24%           | 11.42%           | 15.27%           | 28.15%           |

Table S3 Si oxidation states of Raw-Si and recycled Si powders at different rotation speeds. The ratios were estimated from Si 2p peak area obtained by XPS

| Sample | Si <sup>0</sup> | Si <sup>1+</sup> | Si <sup>2+</sup> | Si <sup>3+</sup> | Si <sup>4+</sup> |
|--------|-----------------|------------------|------------------|------------------|------------------|
| 300-2  | 40.76%          | 17.23%           | 7.55%            | 11.51%           | 22.95%           |
| 400-2  | 33.33%          | 13.79%           | 5.48%            | 14.07%           | 33.32%           |
| 500-2  | 25.43%          | 20.94%           | 11.89%           | 17.71%           | 24.03%           |
| 600-2  | 20.31%          | 17.31%           | 5.51%            | 21.18%           | 35.70%           |

Table S4 Al oxidataion states of Raw-Si and recycled Si powders at different rotation speeds

| Sample | Al     | Al <sub>2</sub> O <sub>3</sub> |
|--------|--------|--------------------------------|
| Raw    | 17.94% | 82.06%                         |
| 500-2  | 14.42% | 85.58%                         |
| 600-2  | 8.70%  | 91.30%                         |

Table S5 EIS fitting results of cells comprising recycled Si at different milling times

| Sample | R <sub>E</sub> ( $\Omega$ ) | R <sub>SEI</sub> ( $\Omega$ ) | R <sub>CT</sub> ( $\Omega$ ) |
|--------|-----------------------------|-------------------------------|------------------------------|
| Raw    | 5.02                        | 70.55                         | 52.86                        |
| 500-1  | 1.17                        | 44.52                         | 39.38                        |
| 500-2  | 2.12                        | 30.44                         | 29.19                        |
| 500-5  | 1.26                        | 53.60                         | 41.45                        |

Table S6 EIS fitting results of cells comprising recycled Si at different rotation speeds

| Sample | R <sub>E</sub> ( $\Omega$ ) | R <sub>SEI</sub> ( $\Omega$ ) | R <sub>CT</sub> ( $\Omega$ ) |
|--------|-----------------------------|-------------------------------|------------------------------|
| 300-2  | 2.02                        | 42.60                         | 39.49                        |
| 400-2  | 6.32                        | 33.05                         | 44.18                        |
| 500-2  | 2.12                        | 30.44                         | 29.19                        |
| 600-2  | 1.32                        | 64.54                         | 49.79                        |

Table S7 N 1s deconvolution results of O-CP and H-CP substrates

| Sample | Pyridinic nitrogen (N-6) | Pyrrolic nitrogen (N-5) | Quaternary nitrogen (N-Q) |
|--------|--------------------------|-------------------------|---------------------------|
| O-CP   | 13.04%                   | 43.51%                  | 43.46%                    |
| H-CP   | 18.43%                   | 43.16%                  | 38.41%                    |

Table S8 EIS fitting results of recycled Si-based cells comprising different substrates

| Sample      | $R_E$ ( $\Omega$ ) | $R_{SEI}$ ( $\Omega$ ) | $R_{CT}$ ( $\Omega$ ) |
|-------------|--------------------|------------------------|-----------------------|
| Cu          | 3.19               | 584.90                 | 253.20                |
| Pristine CP | 2.17               | 34.16                  | 74.44                 |
| O-CP        | 2.80               | 40.36                  | 72.95                 |
| H-CP        | 1.69               | 29.25                  | 30.34                 |

Table S9 Estimated lithium-ion diffusion coefficients of recycled Si-based cells comprising different substrates

| Sample      | Oxidation $D_0$ ( $\text{cm}^2 \text{s}^{-1}$ ) | Reduction $D_0$ ( $\text{cm}^2 \text{s}^{-1}$ ) |
|-------------|-------------------------------------------------|-------------------------------------------------|
| Cu          | $4.79 \times 10^{-19}$                          | $4.36 \times 10^{-18}$                          |
| Pristine CP | $7.10 \times 10^{-16}$                          | $6.51 \times 10^{-16}$                          |
| O-CP        | $5.74 \times 10^{-16}$                          | $1.07 \times 10^{-15}$                          |
| H-CP        | $1.08 \times 10^{-15}$                          | $1.25 \times 10^{-15}$                          |
